# Supplementary material for: Acid versus base peptization of mesoporous nanocrystalline TiO2 films: functional studies in dye sensitized solar cells
Source: Royal Society of Chemistry journal article supplement (doi:10.1039/b407963a), 2004-10-20
Supplement: b407963a.pdf [file b407963a.pdf]

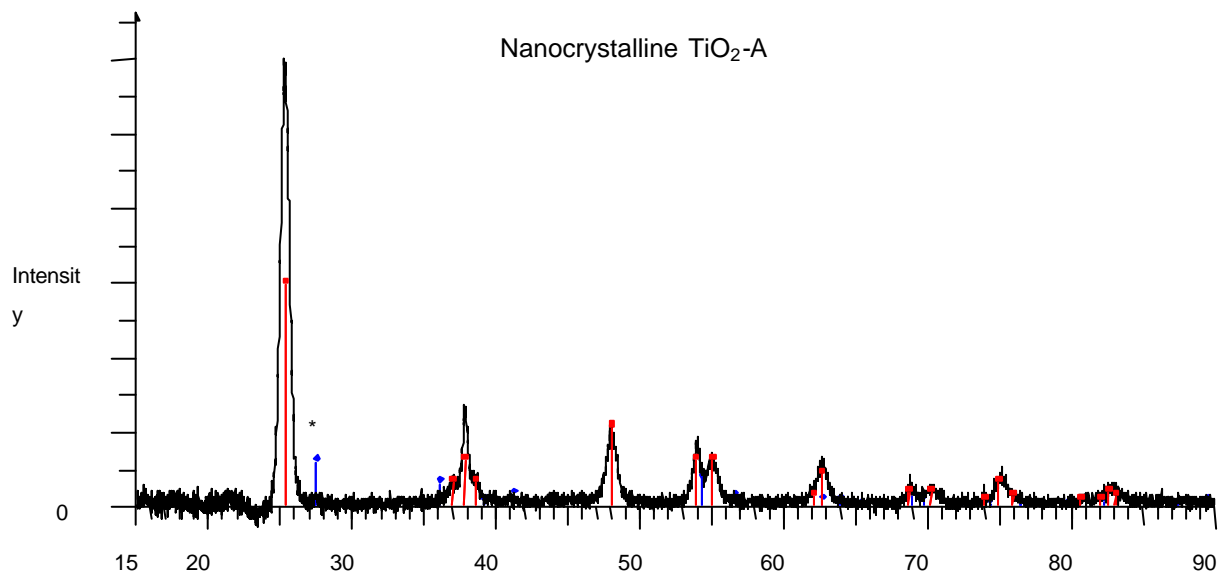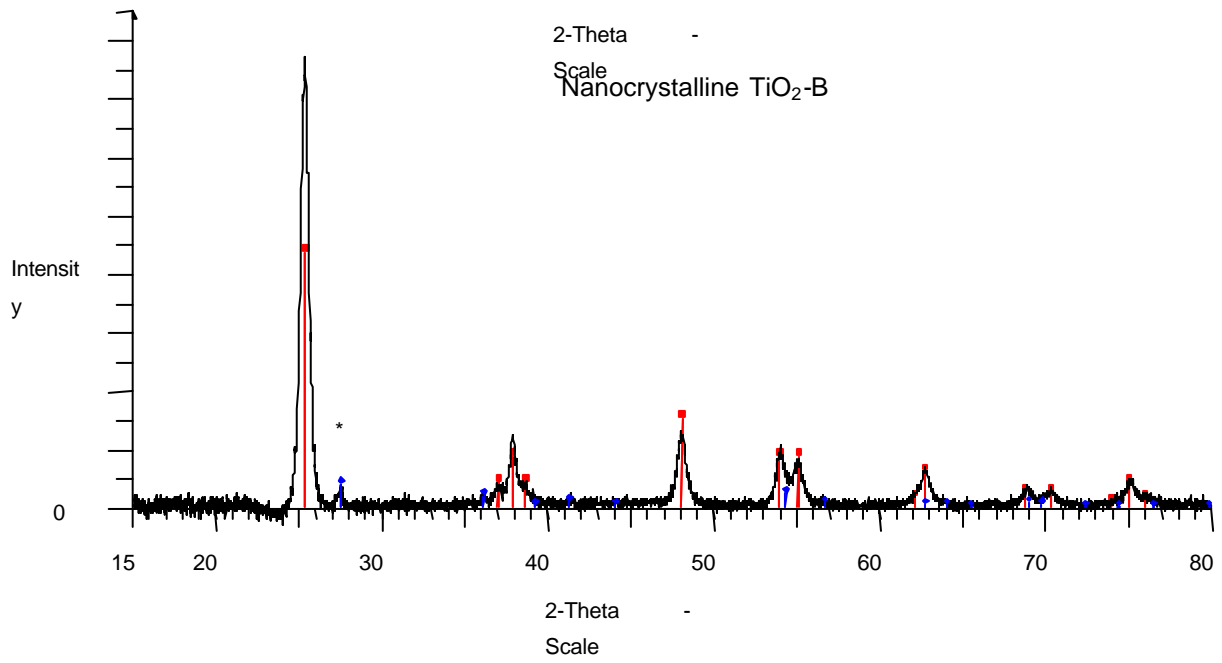

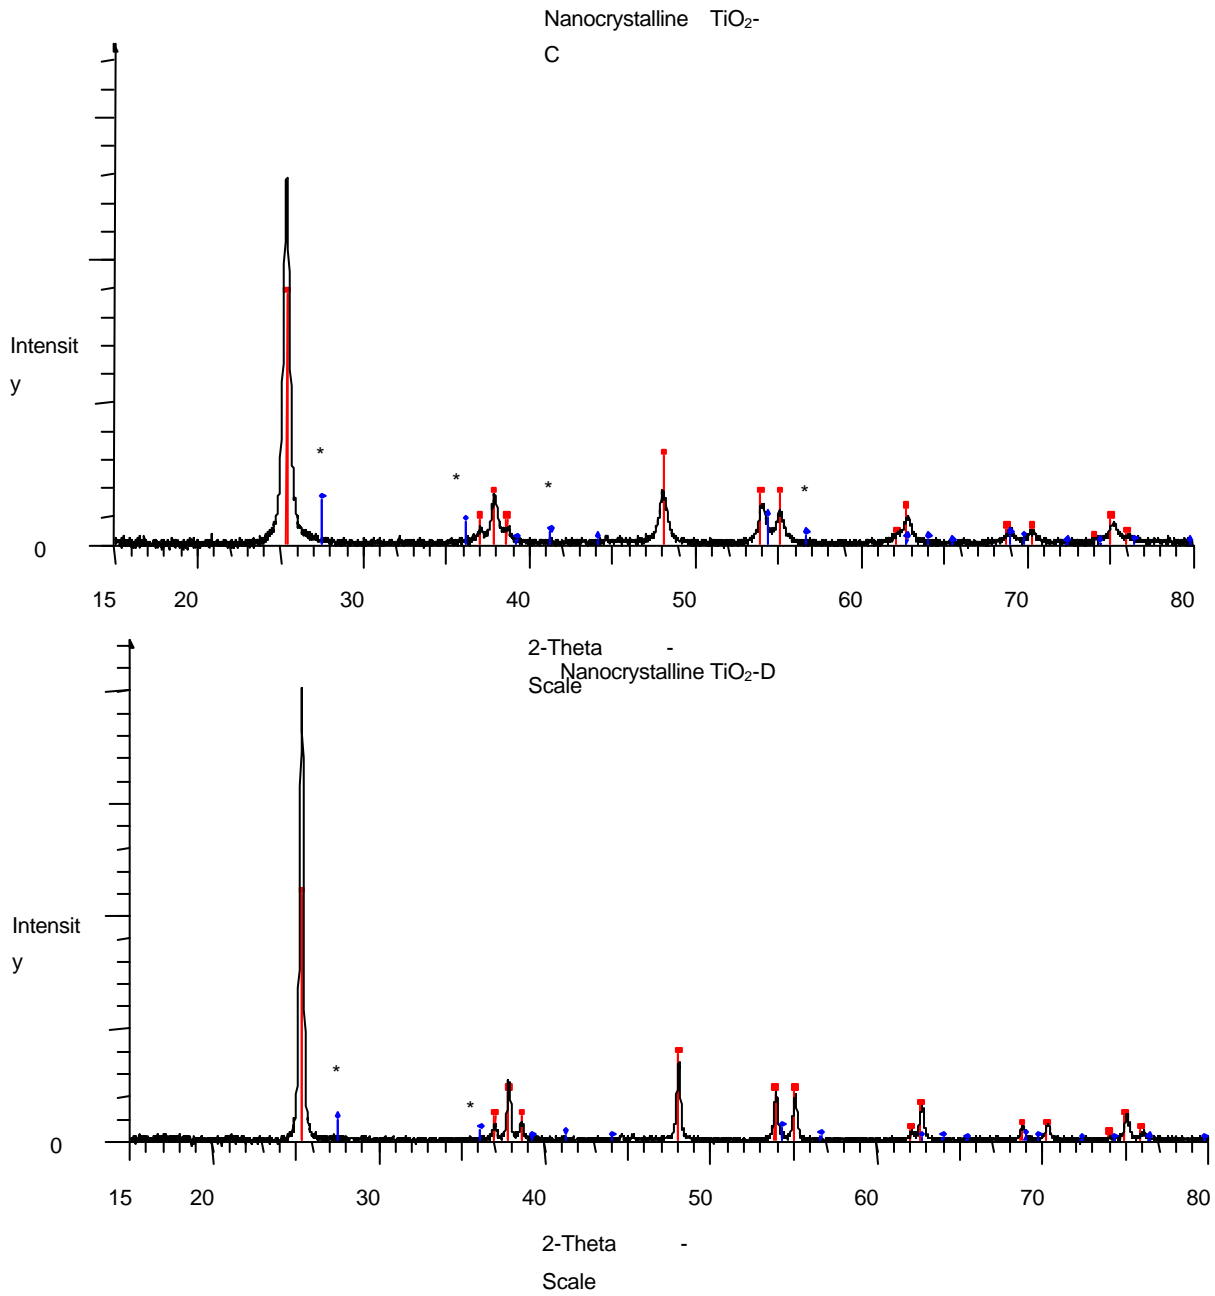

**Figure 1.** XRD data for of Nanocrystalline TiO<sub>2</sub>. Rutile phases are indicated in Blue. Almost no formation of the rutile phase is observed.
